# Supplementary material for: The development and validation of postpartum hemorrhage prediction models for pregnancies with placenta previa totalis based on coagulation function indexes: A retrospective cohort study
Source: Research Square preprint supplement (doi:10.21203/rs.3.rs-5844879/v1), 2025-04-21
Supplement: Supplementary file 1 [file da9986ba94afd708e7a80e52.docx]

**Table S1 The risk of postpartum hemorrhage for pregnancies with placenta previa in previous studies**

| Ref | Author (publication date) | Country | Research method | Statistical analysis | PPH definition | Risk factors |
| --- | --- | --- | --- | --- | --- | --- |
| 12 | C. Chen et al. (2019) | China | Single-center retrospective cohort study | logistic regression analysis | blood loss over 1500 mL | maternal age  times of delivery  times of miscarriage  history of vaginal delivery  delivery gestational age  depth of placenta invasion |
| 8 | Y. Zhou et al. (2022) | China | Single-center retrospective cohort study | LASSO regression analysis  logistics regression analysis | blood loss over 1000 mL | maternal age  delivery gestational age  neonatal birth weight,  gestational diabetes mellitus  amniotic fluid index  gestational bleeding,  ultrasonic risk single score |
| 13 | C.A. DeBolt et al. (2022) | USA | Single-center retrospective cohort study | logistic regression analysis | blood loss ≥ 1000 mL  blood loss associated with signs or symptoms of hypovolemia | maternal age  body mass index  in-vitro fertilization  antenatal corticosteroids  placental location |
| 9 | J.Y. Lee et al. (2018) | South Korea | Single-center retrospective cohort study | multivariable analysis | blood loss (≥2000 mL)  packed RBCs transfusion (≥4)  uterine artery embolization  hysterectomy | maternal age  antepartum bleeding  non-cephalic presentation  complete placenta previa  anterior placenta  multiple lacunae  uteroplacental hypervascularity |
| 15 | Y. Wang et al (2022) | China | Single-center retrospective cohort study | univariate analysis  logistic regression | blood loss ≥2000 mL | gravidity,  parity  number of prior cesarean deliveries  placenta accreta ultrasound scores |
| 17 | T. Lu et al.  (2022) | China | Single-center retrospective cohort study | univariate analysis  logistic regression | blood loss ≥1000 mL | placental thickness  cervical length  prior cesarean section  placenta previa |
| 7 | X. Dang et al. (2022) | China | multicenter retrospective case-control study | logistic regression | blood loss ≥ 1,500 ml  RBC transfusion ≥4U | delivery gestational age  hemoglobin  preoperative bleeding  vascular engorgement  placenta previa  placenta accreta spectrum  number of prior cesarean delivery |
| 11 | R. Lu et al.  (2021) | China | Single-center retrospective cohort study | univariate analysis  logistic regression | blood loss ≥2500 mL | vascular lacunae within the placenta  hypervascularity of the uterine-placental margin  uterine serosa-bladder wall interface  emergency cesarean section  preoperative balloon placement |
| 10 | J.-W. Kim et al. (2017) | Korea | Single-center retrospective cohort study | logistic regression | transfusion of ≥8 units of packed RBCs | ultrasound suspicion of placental adhesion  previous caesarean section  gestational age  sponge-like appearance of the cervix  anterior placenta |

**Table S2** **Characteristics of patient population in development and test cohort.**

|  | **Development cohort**  **(N=214)** | **Test cohort**  **(N=92)** | **P value** |
| --- | --- | --- | --- |
| Age, yr, median (IQR) | 33.0 [30.0;37.0] | 34.0 [30.8;37.0] | 0.481 |
| BMI, kg/m2, mean±SD | 26.4±3.50 | 26.0±3.42 | 0.402 |
| Mean arterial pressure, mmHg, mean±SD | 91.2±10.6 | 91.3±9.09 | 0.923 |
| PLT | 194±53.8 | 194±59.3 | 0.992 |
| D-Dimer | 1.10±0.92 | 1.54±3.41 | 0.233 |
| APTT | 27.4±2.86 | 27.2±2.50 | 0.423 |
| PT | 10.8±0.93 | 10.8±0.95 | 0.945 |
| TT | 15.4±1.89 | 15.7±1.79 | 0.268 |
| FIB | 4.15±0.92 | 4.03±0.93 | 0.297 |
| Preoperative hemoglobin | 111±13.2 | 112±14.0 | 0.497 |
| Gravidity, no. (%) |  |  | 0.42 |
| 1 | 30 (14.0) | 19 (20.7) |  |
| 2 | 45 (21.0) | 17 (18.5) |  |
| 3 | 54 (25.2) | 20 (21.7) |  |
| 4 | 46 (21.5) | 15 (16.3) |  |
| ≥5 | 39 (18.2) | 21 (22.8) |  |
| Parity, no. (%) |  |  | 0.97 |
| 0 | 75 (35.0) | 33 (35.9) |  |
| 1 |  |  |  |
| ≥2 |  |  |  |
| CS, no. (%) |  |  | 0.48 |
| 0 | 103 (48.1) | 48 (52.2) |  |
| 1 | 97 (45.3) | 41 (44.6) |  |
| ≥2 | 14 (6.54) | 3 (3.26) |  |
| Previous uterine surgery*, no. (%) |  |  | 0.585 |
| 0 | 74 (34.6) | 37 (40.2) |  |
| 1 | 66 (30.8) | 24 (26.1) |  |
| ≥2 | 74 (34.6) | 31 (33.7) |  |
| IVF, no. (%) | 35 (16.4) | 11 (12.0) | 0.416 |
| Hypertension, no. (%) | 9 (4.21) | 2 (2.17) | 0.59 |
| Diabetes, no. (%) | 55 (25.7) | 21 (22.8) | 0.697 |
| Immune disease, no. (%) | 14 (6.54) | 4 (4.35) | 0.63 |
| Gestational age, mean±SD | 35.6±1.92 | 35.7±1.43 | 0.558 |
| Antepartum bleeding, no. (%) | 106 (49.5) | 35 (38.0) | 0.085 |
| Emergency CS, no. (%) | 56 (26.2) | 24 (26.1) | >0.99 |

“*” Previous uterine surgery including uterine cavity and uterine body operation, such as vacuum aspiration, uterine curettage, and myomectomy, only excluding cesarean section.

BMI: Body mass index; PLT: Platelet count; APTT: Activated partial thromboplastin time; PT: Prothrombin time; TT: Thrombin time; FIB: Fibrinogen; CS: Cesarean section; IVF: in-vitro fertilization

**Table S3 Characteristics by postpartum hemorrhage in development cohort.**

|  | **PPH**  **(N=115)** | **Non-PPH**  **(N=99)** | **P Value** |
| --- | --- | --- | --- |
| Age, yr, median (IQR) | 33.3 (4.22) | 33.1 (4.90) | 0.730 |
| BMI, kg/m2, mean±SD | 26.6±3.31 | 26.2±3.72 | 0.387 |
| Mean arterial pressure, mmHg, mean±SD | 91.9±12.2 | 90.4±8.29 | 0.285 |
| PLT, mean±SD | 185±48.6 | 204±57.9 | 0.012 |
| D-Dimer, mean±SD | 1.25±1.07 | 0.93±0.68 | 0.009 |
| APTT, mean±SD | 27.9±3.27 | 26.9±2.21 | 0.015 |
| PT, mean±SD | 10.7±0.97 | 10.8±0.89 | 0.590 |
| TT, mean±SD | 15.2±1.72 | 15.7±2.06 | 0.111 |
| FIB, mean±SD | 3.98±0.89 | 4.34±0.93 | 0.004 |
| Hemoglobin, mean±SD | 109±12.4 | 114±13.7 | 0.008 |
| Gravidity, no. (%) |  |  | 0.001 |
| 1 | 6 (5.22) | 24 (24.2) |  |
| 2 | 23 (20.0) | 22 (22.2) |  |
| 3 | 31 (27.0) | 23 (23.2) |  |
| 4 | 30 (26.1) | 16 (16.2) |  |
| >=5 | 25 (21.7) | 14 (14.1) |  |
| Parity, no. (%) |  |  | <0.001 |
| 0 | 28 (24.3) | 47 (47.5) |  |
| 1 | 66 (57.4) | 41 (41.4) |  |
| ≥2 | 21 (18.3) | 11 (11.1) |  |
| CS, no. (%) |  |  | <0.001 |
| 0 | 39 (33.9) | 64 (64.6) |  |
| 1 | 66 (57.4) | 31 (31.3) |  |
| >=2 | 10 (8.70) | 4 (4.04) |  |
| Previous uterine surgery*, no. (%) |  |  | 0.001 |
| 0 | 27 (23.5) | 47 (47.5) |  |
| 1 | 42 (36.5) | 24 (24.2) |  |
| ≥2 | 46 (40.0) | 28 (28.3) |  |
| IVF, no. (%) | 17 (14.8) | 18 (18.2) | 0.628 |
| Hypertension, no. (%) | 5 (4.35) | 4 (4.04) | >0.99 |
| Diabetes, no. (%) | 31 (27.0) | 24 (24.2) | 0.767 |
| Immune disease, no. (%) | 3 (2.61) | 11 (11.1) | 0.026* |
| Gestational age, mean±SD | 35.3±2.02 | 35.9±1.75 | 0.007 |
| Antepartum bleeding, no. (%) | 70 (60.9) | 36 (36.4%) | 0.001 |
| Emergency CS, no. (%) | 38 (33.0%) | 18 (18.2) | 0.021 |

“*” Previous uterine surgery including uterine cavity and uterine body operation, such as vacuum aspiration, uterine curettage, and myomectomy, only excluding cesarean section.

BMI: Body mass index; PLT: Platelet count; APTT: Activated partial thromboplastin time; PT: Prothrombin time; TT: Thrombin time; FIB: Fibrinogen; CS: Cesarean section; IVF: in-vitro fertilization.

**Table S4 AUC and AIC performance in different prediction models**

| **Model** | **Fibrinogen** | **Cesarean times** | **antepartum bleeding** | **AUC** | **AIC** |
| --- | --- | --- | --- | --- | --- |
| Model 1 | **-** | **+** | **+** | 0.691 (0.621–0.760) | 275.51 |
| Model 2 | **+** | **-** | **+** | 0.682 (0.611–0.753) | 280.65 |
| Model 3 | **+** | **+** | **-** | 0.690 (0.619–0.761) | 280.49 |
| Model 4 | **+** | **+** | **+** | 0.721 (0.652–0.790) | 272.24 |

AUC: Area under curve; AIC: Akaike information criterion

**Table S5 Diagnostic performance in different operating point**

|  | **Operating point I** | **Operating point II** | **P-value** |
| --- | --- | --- | --- |
| Threshold | -0.660 | 0.173 | - |
| Specificity (%, 95% CI) | 70.7 (61.7–79.7) | 89.9 (84.0–95.8) | <0.001 |
| PPV (%, 95% CI) | 72.1 (63.5–80.7) | 79.6 (68.3–90.9) | 0.302 |
| Sensitivity (%, 95% CI) | 65.2 (56.5–73.9) | 33.9 (25.3–42.6) | <0.001 |
| NPV (%, 95% CI) | 63.6 (54.6–72.6) | 53.9 (46.3–53.9) | 0.107 |

PPV: Positive predictive value; NPV: Negative predictive value.

**Table S6 Performance of top-5 machine learning-based model (selected and ranked according to the result of validation) in the test cohort.**

| Rank | AUC  (95% CI) | Specificity  (95% CI) | PPV  (95% CI) | Description | No. of variables |
| --- | --- | --- | --- | --- | --- |
| 1 | 0.683 (0.574–0.792) | 52.4 (37.3–67.5) | 66.1 (54.0–78.2) | PCC_RFE_LR | 5 |
| 2 | 0.680 (0.570–0.789) | 52.4 (37.3–67.5) | 66.1 (54.0–78.2) | PCC_RFE_LDA | 5 |
| 3 | 0.677 (0.567–0.787) | 83.3 (72.1–94.6) | 77.4 (62.7–92.1) | PCC_RFE_LRLASSO | 5 |
| 4 | 0.650 (0.537–0.763) | 66.1 (54.0–78.2) | 65.5 (52.9–78.0) | PCC_RFE_GP | 5 |
| 5 | 0.649 (0.536–0.763) | 59.5 (44.7–74.4) | 67.9 (55.4–80.5) | PCC_RFE_GP | 4 |

AUC: Area under curve; PPV: Positive predictive value
